# Supplementary material for: mRNA stability and the unfolding of gene expression in the long-period yeast metabolic cycle
Source: Springer Nature journal article supplement (doi:10.1186/1752-0509-3-18), 2009-02-06
Supplement: 12918_2008_286_MOESM3_ESM.pdf [file 12918_2008_286_MOESM3_ESM.pdf]

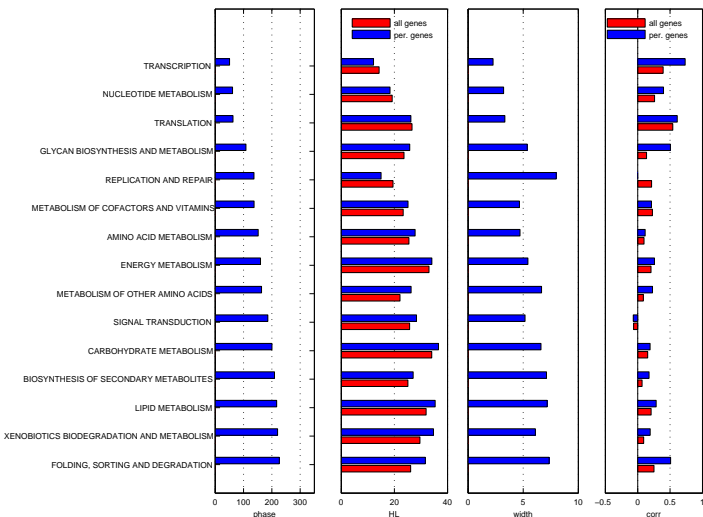

(a)

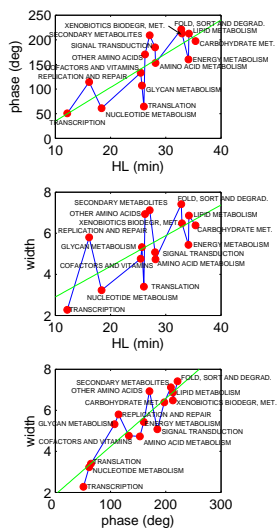

(b)

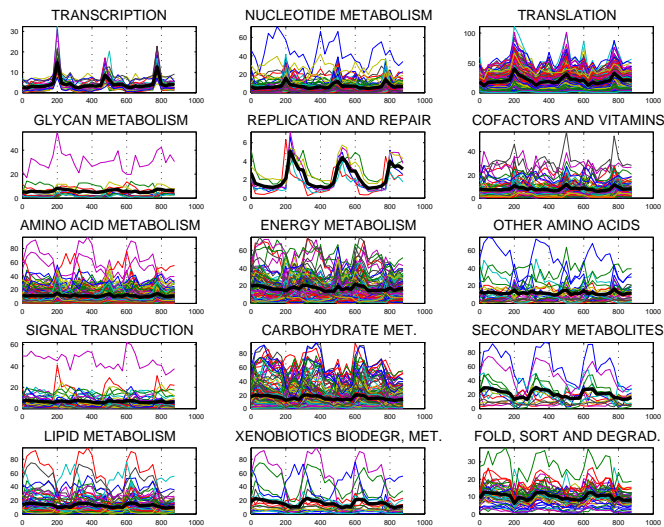

(c)
