# Supplementary material for: mRNA stability and the unfolding of gene expression in the long-period yeast metabolic cycle
Source: Springer Nature journal article supplement (doi:10.1186/1752-0509-3-18), 2009-02-06
Supplement: 12918_2008_286_MOESM4_ESM.pdf [file 12918_2008_286_MOESM4_ESM.pdf]

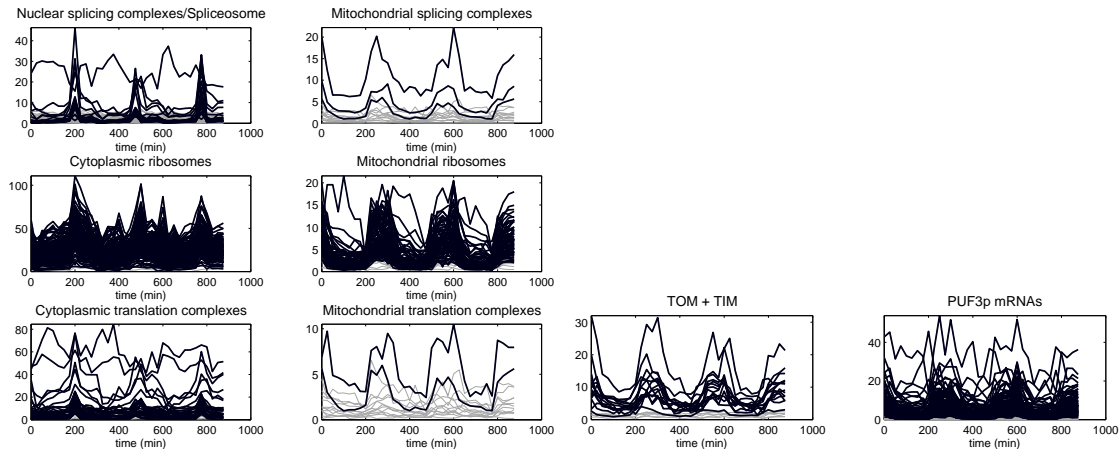

(a)

(b)

| Complex (periodic genes only)       | phase | HL   | width |
|-------------------------------------|-------|------|-------|
| Nuclear splicing complexes          | 55.11 | 13.7 | 2.22  |
| Cytoplasmic ribosomes               | 47.5  | 24.7 | 2.77  |
| Cytoplasmic translation complexes   | 64.9  | 17.8 | 2.1   |
| Mitochondrial splicing complexes    | 125.3 | 22.4 | 6.67  |
| Mitochondrial ribosomes             | 128.2 | 24   | 8.23  |
| Mitochondrial translation complexes | 127   | 26.7 | 8.5   |
| TOM + TIM translocases              | 127.1 | 19.6 | 6.57  |
| PUF3p mRNAs                         | 129.7 | 25.4 | 7.38  |

(c)
