# Supplementary material for: mRNA stability and the unfolding of gene expression in the long-period yeast metabolic cycle
Source: Springer Nature journal article supplement (doi:10.1186/1752-0509-3-18), 2009-02-06

all genes with same TF target motif

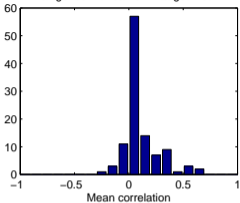

periodic genes with same TF target motif

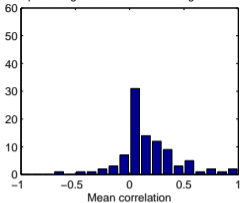

all genes with same target motif in mRNA

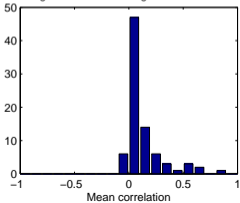

periodic genes with same target motif in mRNA

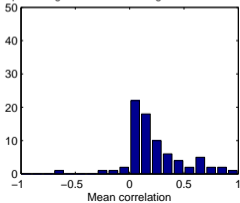

Supplement: 12918_2008_286_MOESM5_ESM.pdf [file 12918_2008_286_MOESM5_ESM.pdf]
